# Supplementary material
Source: Springer Nature journal article supplement (https://www.springermedizin.de/resource/supplementary/12903_2011_218_MOESM3_ESM.pdf/9516376)

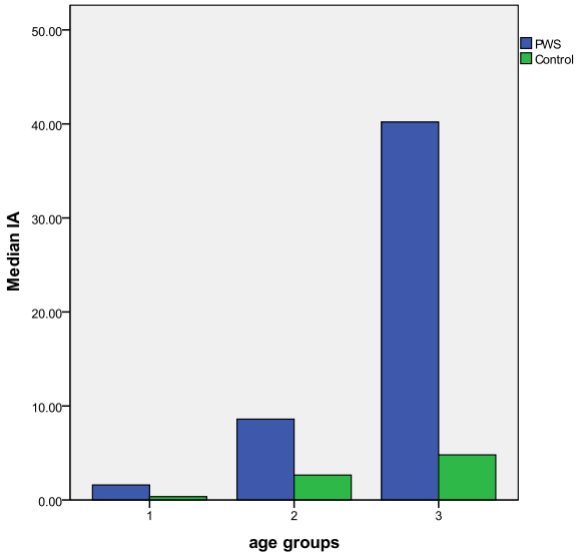

Supplement: MOESM3 [file 9516376]
